# Supplementary material for: Systemic Periodontal Risk Score Using an Innovative Machine Learning Strategy: An Observational Study
Source: MDPI journal article supplement (doi:10.3390/jpm12020217), 2022-02-04
Supplement: s1 [file s1]

**Table S2.** Performance of the Multilayer Perceptron model for each category of periodontal health to predict.

|           | <b>Precision</b> | <b>Recall</b> | <b>Specificity</b> | <b>F1-Score</b> |
|-----------|------------------|---------------|--------------------|-----------------|
| CPITN 0   | 0.70             | 0.78          | 0.70               | 0.74            |
| CPITN 1-2 | 0.50             | 0.23          | 0.90               | 0.32            |
| CPITN 3-4 | 0.57             | 0.83          | 0.82               | 0.68            |
| Average   | 0.61             | 0.63          | 0.78               | 0.60            |
