# Supplementary material for: Systemic Periodontal Risk Score Using an Innovative Machine Learning Strategy: An Observational Study
Source: MDPI journal article supplement (doi:10.3390/jpm12020217), 2022-02-04
Supplement: s1 [file s1]

**Table S1.** Medical and sociodemographic characteristics of the study population

|                                                       | All<br>N = 532 | CPITN 0<br>N = 225 | CPITN 1-2<br>N = 152 | CPITN 3-4<br>N = 155 | p-value |
|-------------------------------------------------------|----------------|--------------------|----------------------|----------------------|---------|
| <b>Age</b>                                            | 33.0 ± 22.6    | 20.7 ± 17.6        | 28.9 ± 19.5          | 54.8 ± 14.7          | < 0.001 |
| <b>Sex</b>                                            | 532            | 225                | 152                  | 155                  |         |
| Male                                                  | 295 (55%)      | 133 (59%)          | 72 (47%)             | 90 (58%)             | 0.06    |
| Female                                                | 237 (45%)      | 92 (41%)           | 80 (53%)             | 65 (42%)             |         |
| <b>BMI</b>                                            | 22.7 ± 5.8     | 20.5 ± 5.3         | 22.8 ± 5.9           | 25.8 ± 4.8           | < 0.001 |
| <b>Smoking habits</b>                                 | 530            | 225                | 152                  | 153                  |         |
| Non smoker                                            | 379 (72%)      | 192 (85%)          | 112 (73%)            | 75 (49%)             | < 0.001 |
| Former smoker (>10 years)                             | 23 (4%)        | 2 (1%)             | 4 (3%)               | 17 (11%)             |         |
| Former smoker (>2 years)                              | 20 (4%)        | 1 (.5%)            | 3 (2%)               | 16 (10%)             |         |
| Former smoker (>6 months)                             | 18 (3%)        | 1 (.5%)            | 6 (4%)               | 11 (7%)              |         |
| Current smoker                                        | 90 (17%)       | 29 (13%)           | 27 (18%)             | 34 (23%)             |         |
| <b>Systemic pathology</b>                             | 519            | 218                | 150                  | 151                  |         |
| No                                                    | 318 (61%)      | 172 (79%)          | 96 (64%)             | 50 (33%)             | < 0.001 |
| Yes                                                   | 201 (39%)      | 46 (21%)           | 54 (36%)             | 101 (67%)            |         |
| <b>Level of education</b>                             | 439            | 172                | 124                  | 141                  |         |
| Primary School                                        | 78 (18%)       | 53 (31%)           | 17 (14%)             | 8 (6%)               | < 0.001 |
| Technical                                             | 67 (15%)       | 10 (6%)            | 16 (13%)             | 40 (28%)             |         |
| High School                                           | 126 (29%)      | 48 (28%)           | 41 (33%)             | 41 (29%)             |         |
| College                                               | 168 (38%)      | 61 (35%)           | 50 (40%)             | 52 (37%)             |         |
| <b>Allergies</b>                                      | 465            | 181                | 136                  | 148                  |         |
| No                                                    | 339 (73%)      | 134 (74%)          | 98 (72%)             | 107 (72%)            | < 0.001 |
| Yes                                                   | 126 (27%)      | 47 (26%)           | 38 (28%)             | 41 (28%)             |         |
| <b>Contraceptive pill</b>                             | 217            | 79                 | 50                   | 83                   |         |
| No                                                    | 143 (66%)      | 48 (61%)           | 30 (60%)             | 63 (76%)             | < 0.001 |
| Yes                                                   | 74 (34%)       | 31 (39%)           | 20 (40%)             | 20 (24%)             |         |
| <b>Any previous pathological pregnancies</b>          | 233            | 88                 | 55                   | 90                   |         |
| No                                                    | 204 (88%)      | 75 (85%)           | 46 (84%)             | 83 (92%)             | < 0.001 |
| Yes                                                   | 29 (12%)       | 13 (15%)           | 9 (16%)              | 7 (8%)               |         |
| <b>Hormonal status</b>                                | 214            | 81                 | 48                   | 80                   |         |
| Non-menopausal                                        | 140 (65%)      | 65 (80%)           | 38 (79%)             | 32 (40%)             | < 0.001 |
| Menopausal                                            | 74 (37%)       | 16 (20%)           | 10 (21%)             | 48 (60%)             |         |
| <b>Perceived stress level (0 to 10)</b>               | 4.2 ± 2.4      | 4.0 ± 2.2          | 3.9 ± 2.4            | 4.7 ± 2.5            | 0.05    |
| <b>Bread, rusks, or cereals consumption</b>           | 529            | 224                | 152                  | 153                  |         |
| Never                                                 | 23 (4%)        | 7 (3%)             | 6 (4%)               | 10 (7%)              | 0.09    |
| Sometimes                                             | 56 (11%)       | 28 (13%)           | 19 (13%)             | 9 (6%)               |         |
| Several times a week                                  | 60 (12%)       | 26 (12%)           | 20 (13%)             | 14 (9%)              |         |
| Once a day                                            | 177 (33%)      | 84 (38%)           | 47 (31%)             | 46 (30%)             |         |
| Several times a day                                   | 213 (40%)      | 79 (34%)           | 60 (39%)             | 74 (48%)             |         |
| <b>Rice, pasta, semolina, or potatoes consumption</b> | 475            | 184                | 139                  | 152                  |         |
| Never                                                 | 3 (1%)         | 2 (1%)             | 0 (0%)               | 1 (1%)               | < 0.001 |
| Sometimes                                             | 41 (9%)        | 16 (9%)            | 5 (4%)               | 20 (13%)             |         |
| Several times a week                                  | 223 (46%)      | 90 (49%)           | 63 (45%)             | 70 (46%)             |         |
| Once a day                                            | 138 (29%)      | 49 (26%)           | 47 (34%)             | 42 (28%)             |         |

|                                                              |           |           |          |          |         |
|--------------------------------------------------------------|-----------|-----------|----------|----------|---------|
| <i>Several times a day</i>                                   | 70 (15%)  | 27 (15%)  | 24 (17%) | 19 (12%) |         |
| <b>Dried vegetable or fruit consumption</b>                  | 475       | 184       | 138      | 153      |         |
| <i>Never</i>                                                 | 33 (7%)   | 15 (8%)   | 15 (11%) | 3 (2%)   |         |
| <i>Sometimes</i>                                             | 206 (43%) | 87 (47%)  | 56 (41%) | 63 (41%) |         |
| <i>Several times a week</i>                                  | 147 (31%) | 55 (30%)  | 44 (32%) | 48 (31%) | < 0.001 |
| <i>Once a day</i>                                            | 62 (13%)  | 22 (12%)  | 16 (11%) | 24 (16%) |         |
| <i>Several times a day</i>                                   | 27 (6%)   | 5 (3%)    | 7 (5%)   | 15 (10%) |         |
| <b>Vegetable consumption</b>                                 | 526       | 223       | 152      | 153      |         |
| <i>Never</i>                                                 | 10 (2%)   | 5 (2%)    | 4 (2%)   | 1 (1%)   |         |
| <i>Sometimes</i>                                             | 53 (10%)  | 25 (11%)  | 19 (13%) | 9 (6%)   |         |
| <i>Several times a week</i>                                  | 139 (27%) | 56 (25%)  | 45 (30%) | 40 (26%) | 0.40    |
| <i>Once a day</i>                                            | 160 (30%) | 68 (31%)  | 39 (25%) | 53 (35%) |         |
| <i>Several times a day</i>                                   | 164 (31%) | 69 (31%)  | 45 (30%) | 50 (32%) |         |
| <b>Fruit consumption</b>                                     | 529       | 224       | 152      | 153      |         |
| <i>Never</i>                                                 | 13 (3%)   | 8 (4%)    | 3 (2%)   | 2 (1%)   |         |
| <i>Sometimes</i>                                             | 54 (10%)  | 9 (4%)    | 18 (12%) | 27 (18%) |         |
| <i>Several times a week</i>                                  | 123 (23%) | 49 (22%)  | 39 (26%) | 35 (23%) | 0.001   |
| <i>Once a day</i>                                            | 162 (31%) | 66 (29%)  | 49 (32%) | 47 (31%) |         |
| <i>Several times a day</i>                                   | 177 (33%) | 92 (41%)  | 43 (28%) | 42 (27%) |         |
| <b>Dairy product consumption</b>                             | 527       | 224       | 152      | 153      |         |
| <i>Never</i>                                                 | 12 (2%)   | 2 (1%)    | 3 (2%)   | 7 (5%)   |         |
| <i>Sometimes</i>                                             | 55 (10%)  | 16 (7%)   | 20 (13%) | 21 (15%) |         |
| <i>Several times a week</i>                                  | 105 (20%) | 44 (20%)  | 30 (20%) | 31 (20%) | 0.11    |
| <i>Once a day</i>                                            | 167 (32%) | 71 (32%)  | 49 (32%) | 47 (30%) |         |
| <i>Several times a day</i>                                   | 188 (36%) | 91 (40%)  | 50 (33%) | 47 (30%) |         |
| <b>Meat and egg consumption</b>                              | 475       | 184       | 139      | 152      |         |
| <i>Never</i>                                                 | 5 (1%)    | 3 (2%)    | 1 (1%)   | 1 (1%)   |         |
| <i>Sometimes</i>                                             | 39 (8%)   | 12 (6%)   | 15 (11%) | 12 (8%)  |         |
| <i>Several times a week</i>                                  | 208 (44%) | 86 (47%)  | 53 (38%) | 69 (45%) | < 0.001 |
| <i>Once a day</i>                                            | 160 (34%) | 58 (31%)  | 48 (35%) | 54 (36%) |         |
| <i>Several times a day</i>                                   | 63 (13%)  | 25 (14%)  | 22 (15%) | 16 (10%) |         |
| <b>Fish or any other sea-food product consumption</b>        | 476       | 184       | 139      | 153      |         |
| <i>Never</i>                                                 | 25 (5%)   | 13 (7%)   | 8 (6%)   | 4 (2%)   |         |
| <i>Sometimes</i>                                             | 186 (39%) | 77 (42%)  | 59 (42%) | 50 (33%) |         |
| <i>Several times a week</i>                                  | 210 (44%) | 79 (43%)  | 56 (40%) | 75 (49%) | < 0.001 |
| <i>Once a day</i>                                            | 46 (10%)  | 11 (6%)   | 14 (10%) | 21 (14%) |         |
| <i>Several times a day</i>                                   | 9 (2%)    | 4 (2%)    | 2 (2%)   | 3 (2%)   |         |
| <b>Ready meal consumption</b>                                | 529       | 224       | 152      | 153      |         |
| <i>Never</i>                                                 | 157 (30%) | 51 (23%)  | 49 (32%) | 57 (37%) |         |
| <i>Sometimes</i>                                             | 260 (49%) | 125 (56%) | 73 (48%) | 62 (40%) |         |
| <i>Several times a week</i>                                  | 73 (14%)  | 32 (14%)  | 14 (9%)  | 27 (18%) | 0.01    |
| <i>Once a day</i>                                            | 31 (6%)   | 14 (6%)   | 13 (9%)  | 4 (3%)   |         |
| <i>Several times a day</i>                                   | 8 (1%)    | 2 (1%)    | 3 (2%)   | 3 (2%)   |         |
| <b>Sugary meal consumption</b>                               | 518       | 223       | 152      | 153      |         |
| <i>Never</i>                                                 | 26 (5%)   | 7 (3%)    | 8 (5%)   | 11 (7%)  |         |
| <i>Sometimes</i>                                             | 170 (33%) | 55 (25%)  | 49 (32%) | 66 (43%) |         |
| <i>Several times a week</i>                                  | 147 (28%) | 66 (30%)  | 33 (22%) | 48 (32%) | < 0.001 |
| <i>Once a day</i>                                            | 104(20%)  | 61 (27%)  | 29 (19%) | 14 (9%)  |         |
| <i>Several times a day</i>                                   | 71 (14%)  | 34 (15%)  | 33 (22%) | 14 (9%)  |         |
| <b>Appetizer cookie, crisps, or snack cookie consumption</b> | 476       | 184       | 139      | 153      |         |
| <i>Never</i>                                                 | 67 (14%)  | 17 (9%)   | 18 (13%) | 32 (21%) |         |
| <i>Sometimes</i>                                             | 277 (58%) | 106 (58%) | 87 (62%) | 84 (55%) | < 0.001 |

|                                                |           |           |           |           |         |
|------------------------------------------------|-----------|-----------|-----------|-----------|---------|
| <i>Several times a week</i>                    | 94 (20%)  | 44 (24%)  | 25 (18%)  | 25 (16%)  | <hr/>   |
| <i>Once a day</i>                              | 21 (4%)   | 9 (5%)    | 5 (4%)    | 7 (5%)    |         |
| <i>Several times a day</i>                     | 17 (4%)   | 8 (4%)    | 4 (3%)    | 5 (3%)    |         |
| <b>Food supplements and/or vitamin tablets</b> | 475       | 184       | 138       | 153       |         |
| <i>Never</i>                                   | 334 (70%) | 125 (68%) | 106 (77%) | 103 (67%) |         |
| <i>Sometimes</i>                               | 82 (17%)  | 28 (15%)  | 22 (16%)  | 32 (21%)  |         |
| <i>Several times a week</i>                    | 12 (3%)   | 5 (3%)    | 2 (1%)    | 5 (3%)    | < 0.001 |
| <i>Once a day</i>                              | 36 (8%)   | 22 (12%)  | 7 (5%)    | 7 (5%)    |         |
| <i>Several times a day</i>                     | 11 (2%)   | 4 (2%)    | 1 (1%)    | 6 (4%)    |         |
| <b>Sugary drinks</b>                           | 476       | 184       | 139       | 153       |         |
| <i>Never</i>                                   | 117 (25%) | 36 (20%)  | 24 (17%)  | 57 (37%)  |         |
| <i>Sometimes</i>                               | 180 (38%) | 71 (39%)  | 52 (38%)  | 57 (37%)  |         |
| <i>Several times a week</i>                    | 72 (15%)  | 34 (18%)  | 20 (14%)  | 18 (12%)  | < 0.001 |
| <i>Once a day</i>                              | 62 (13%)  | 30 (16%)  | 21 (15%)  | 11 (7%)   |         |
| <i>Several times a day</i>                     | 45 (9%)   | 13 (7%)   | 22 (16%)  | 10 (7%)   |         |
| <b>Alcohol</b>                                 | 529       | 224       | 152       | 153       |         |
| <i>Never</i>                                   | 261 (49%) | 140 (62%) | 76 (50%)  | 45 (29%)  |         |
| <i>Sometimes</i>                               | 165 (31%) | 52 (23%)  | 50 (33%)  | 63 (41%)  |         |
| <i>Several times a week</i>                    | 73 (14%)  | 26 (12%)  | 20 (13%)  | 27 (18%)  | < 0.001 |
| <i>Once a day</i>                              | 23 (5%)   | 5 (2%)    | 5 (3%)    | 13 (9%)   |         |
| <i>Several times a day</i>                     | 7 (1%)    | 1 (1%)    | 1 (1%)    | 5 (3%)    |         |

---
