# Supplementary material for: Systemic Periodontal Risk Score Using an Innovative Machine Learning Strategy: An Observational Study
Source: J Pers Med. 2022 Feb 4;12(2):217. doi: 10.3390/jpm12020217 (PMC8879877; doi:10.3390/jpm12020217)
Supplement: Supplementary file 1 [file jpm-12-00217-s001.zip]

Archive with 4 entries (4 files):
- Figure S2.png
- FigureS1.tif
- Table S1.pdf
- Table S2.pdf
